# Supplementary material
Source: publisher site journal article supplement (https://www.dovepress.com/article/574550)
Supplement: Supplementary file 1 [file 574550%20Revised%20Supplementary%20material_1.docx]

Table S1 The coefficients of Lasso regression analysis

| variable | Coefficient |
| --- | --- |
| (Intercept) | -1.2709275336 |
| Age | 0.0000000000 |
| Pausimenia_1 | 0.0000000000 |
| Ascites_1 | 1.2204242622 |
| CA125 | 0.0000000000 |
| Bilateral_1 | 0.0000000000 |
| Multifocal_1 | 0.0000000000 |
| Maximum.tumor.diameter | 0.0008053198 |
| Maximal.diameter.of.the.largest.solid.part | 0.0000000000 |
| Proportion.of.solid.components | 0.0000000000 |
| Boundary_1 | 0.7643932041 |
| Morphology_1 | 0.0000000000 |
| Calcification_1 | 0.0000000000 |
| Separation_1 | 0.0000000000 |
| Number.of.papillations_1 | 0.0000000000 |
| Number.of.papillations_2 | 0.0000000000 |
| Number.of.papillations_3 | 0.0000000000 |
| Number.of.papillations_4 | 0.0000000000 |
| Enhanced.echo.behind.the.tumors_1 | 0.0000000000 |
| Acoustic.shadow_1 | 0.0000000000 |
| Blood.flow.score_2 | 0.0000000000 |
| Blood.flow.score_3 | 0.0000000000 |
| Blood.flow.score_4 | 0.8055246802 |
| PSV | 0.0000000000 |
| EDV | 0.0000000000 |
| RI | 0.0000000000 |
